# Supplementary material
Source: PubMed Central journal article supplement (PMC4421821)
Supplement: ncomms7980-s1.pdf [file ncomms7980-s1.pdf]

## Supplementary Figure 1

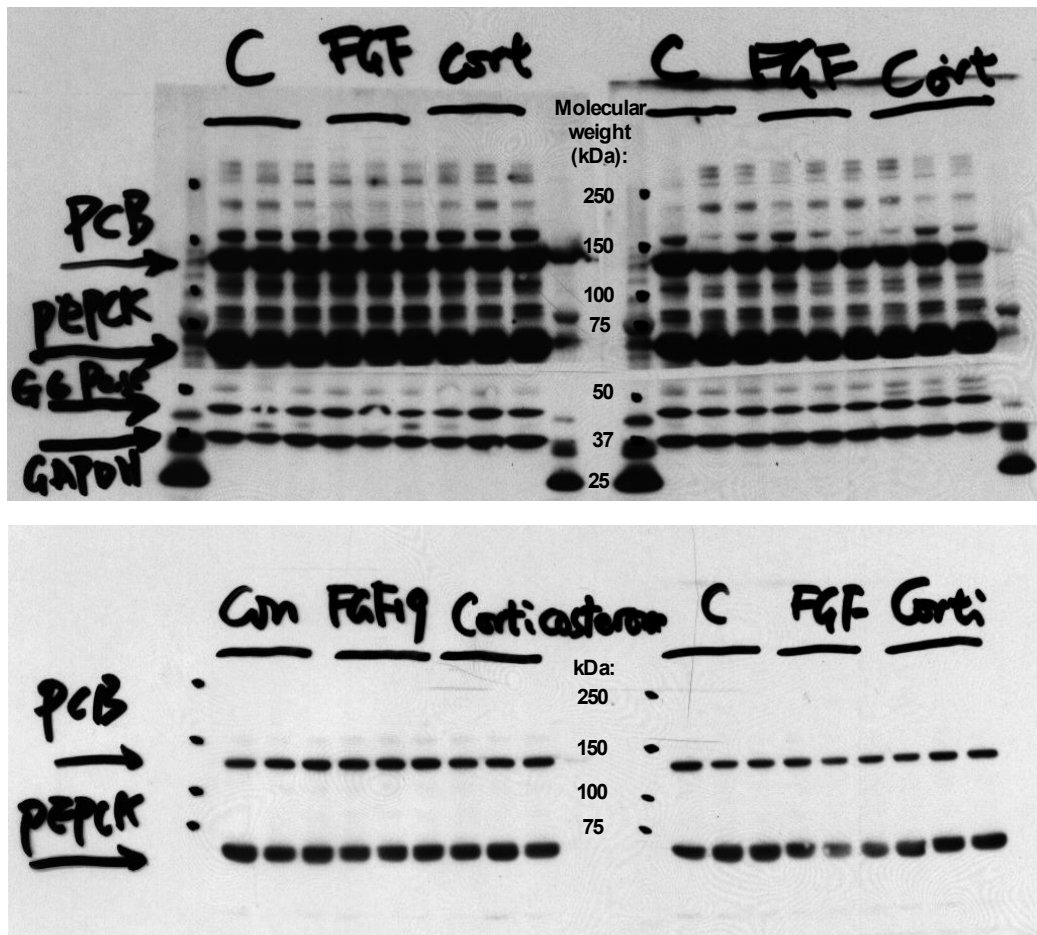

**Supplementary Figure 1.** Uncut Western blots demonstrating that FGF19 (30  $\mu$ g) does not affect liver gluconeogenic protein expression. PCB, pyruvate carboxylase isoform B; PEPCK, cytosolic phosphoenolpyruvate carboxykinase; G6Pase, glucose-6-phosphatase; GAPDH, glyceraldehyde 3-phosphate dehydrogenase.

## Supplementary Figure 2

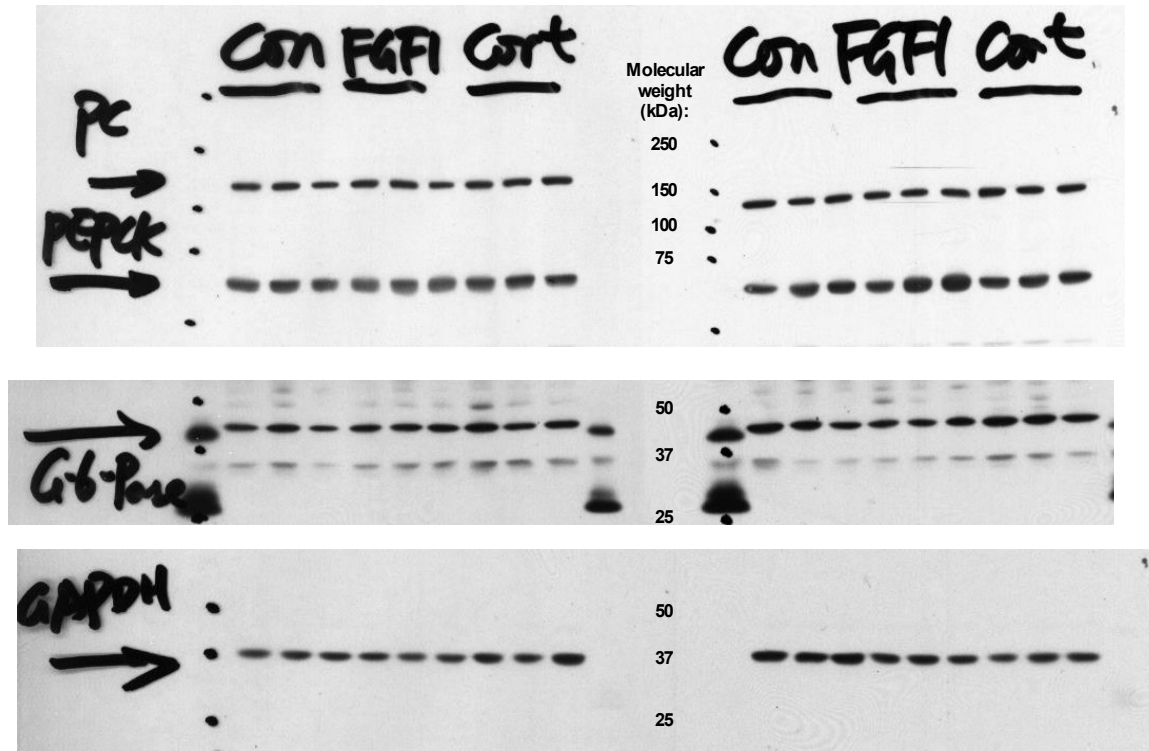

**Supplementary Figure 2.** Uncut Western blots demonstrating that FGF1 (10  $\mu$ g) does not affect liver gluconeogenic protein expression. PC, pyruvate carboxylase isoform B; PEPCK, cytosolic phosphoenolpyruvate carboxykinase; G6Pase, glucose-6-phosphatase; GAPDH, glyceraldehyde 3-phosphate dehydrogenase.
